# Supplementary material for: Photothermally-activated suspended aerogel triggers a biphasic interface reaction for high-efficiency and additive-free hydrogen generation
Source: Royal Society of Chemistry journal article supplement (doi:10.1039/d4mh00964a), 2024-11-22
Supplement: d4mh00964a1.pdf [file d4mh00964a1.pdf]

## Supporting Information

### **Photothermally-activated suspending aerogel triggers biphasic interface reaction for high-efficiency and additive-free hydrogen generation**

*Qian Zhang,<sup>1</sup> Bo Jiang,<sup>1</sup> Yuming Gao,<sup>1</sup> Lin Li,<sup>1,\*</sup> Dawei Tang<sup>1</sup>*

<sup>1</sup>School of Energy and Power Engineering, Key Laboratory of Ocean Energy Utilization and Energy Conservation of Ministry of Education, Dalian University of Technology, 116024, China

## **Experimental Methods**

### **Preparation of the Pd/rGO aerogel**

Firstly,  $\text{Na}_2\text{PdCl}_4$  (0.02 M, 4.5 mL) was added into the GO aqueous solution (1.43 mg/mL, 35.0 mL) with magnetic stirring at room temperature for 2 h. Subsequently, 4.0 g of glucose was added to the homogeneous GO solution under vigorous stirring at room temperature to obtain a uniform solution mixture. After that, the mixture was dropped into a reaction still for hydrothermal reaction (1200 min, 120°C), forming a columniform gel with a diameter of 2 cm. Finally, the gel was washed several times with distilled water and reduced by immersion in a  $\text{NaBH}_4$  (100.0 mM, 1.0 mL) solution for 12 h. After 6 h of freeze-drying treatment, Pd/rGO aerogel was fabricated. It is noted that the thickness of the aerogel can be controlled by regulating the amount of glucose.

### **Characterizations**

X-ray diffraction patterns were obtained on a Rigaku Ultima IV diffractometer with  $\text{Cu K}\alpha$  radiation using a current of 100 mA and a voltage of 40 kV. Scanning electron microscopy images were obtained on a field-emission scanning electron microscope (TESCAN MIRA LMS) with an accelerating voltage of 5 kV. Transmission electron microscopy mapping images were obtained on a transmission electron microscope (Tecnai F30, FEI). Solar absorption spectra were collected using a UV-vis-NIR spectrophotometer (PE Lambda1050).

### **Pure FA dehydrogenation test**

The aerogel was cut into a circle of 1.5 cm in diameter according to the size of the lab-scale nanoreactor (Figure 4a). In a typical reaction, the aerogel is arranged above the liquid FA level, and the gas gap is set as 10 mm. Before being irradiated by a solar simulator (71S0503A, Sofn, China),  $\text{N}_2$  was passed through the nanoreactor to drain air. An optical power meter (S310C, Thorlabs, USA) was employed to ensure the optical density of simulated solar illumination (1  $\text{kW}/\text{m}^2$ ). The generated gas product is first fed into a

condenser to wipe off the rest of the FA or water vapors. Then, the gas products were collected by gas bag and were determined by a gas chromatograph (Agilent 7890B).

### **Theoretical calculation**

Calculations were conducted based on Density Functional Theory. The dispersion-corrected DFT-D3 schemes were employed to describe the possible Van der Waals interactions. The cut-off energy was set to be 400 eV, and the total energy convergence was set to be  $<10^{-5}$  eV. According to the XRD and HRTEM characterization results, Pd (111) crystallographic planes that are easily exposed is evidenced as the main active sites. Thus, we modeled the Pd (111) surface as a  $4 \times 4$  slab with four layers, where the top two layers were relaxed and the bottom two layers were kept fixed. Structures were considered converged when the maximum forces on all atoms were below  $0.02$  eV/Å. The Brillouin zone was sampled with a  $3 \times 3 \times 1$  Monkhorst-Pack k-point mesh. The periodic images were separated by  $10$  Å of vacuum in the c-direction to avoid periodic interactions (Figure S10). For the liquid FA dehydrogenation, we constructed the HCOOH molecule with surrounding three H<sub>2</sub>O molecules as adsorbates adsorbed on the Pd (111) surface (Figure S11). For the gaseous FA dehydrogenation, we constructed a bimolecular hydrogen-bonded complex model (HCOOH-HCOO\*) as the adsorbate adsorbed on the Pd (111) surface (Figure S12). The atomic structures were analyzed via the VESTA code. The reaction energy barrier for each elementary reaction step is evaluated using the climbing image nudged elastic band (CINEB) method with four interpolated images between the initial and final states. The transition states (TS) were similarly optimized until the forces on all atoms were below  $0.05$  eV/Å and were confirmed using vibrational analysis by the presence of a single imaginary mode.

## Equations

Equation S1. The calculation of thermal radiation flux of the aerogel at 70°C according to Planck's law.

$$\mu(\lambda, T) = \frac{8\pi hc}{\lambda^5} \cdot \frac{1}{e^{\frac{hc}{\lambda kT}} - 1}$$

where  $h$  is Planck's constant,  $T$  is the thermodynamic temperature, and  $k$  is Boltzmann's constant.

Equation S2. The calculation of initial turnover frequency.

$$TOF = \frac{P_{atm} V_{H_2} / RT}{n_{Pd} t}$$

where  $P_{atm}$  is the atmospheric pressure (101325 Pa),  $V_{gas}$  is the generated total hydrogen volume when the conversion reaches 20%,  $R$  is the universal gas content (8.314 m<sup>3</sup> Pa mol<sup>-1</sup> K<sup>-1</sup>),  $T$  is room temperature (298 K), and  $t$  is the reaction time when the conversion reaches 20%.  $n_{Pd}$  is the total mole number of Pd in the aerogel (0.0746 mg), which is obtained by the inductively coupled plasma-mass spectroscopy (ICP-MS) characterization of the aerogel.

Equation S3. The calculation of liquid FA diffusion flux ( $N_l$ ) according to Fick law.

$$N_l = D_l^T \frac{c_l^{sat}}{H}$$

where  $D_l^T$  is the diffusion coefficient (1.52×10<sup>-9</sup> m<sup>2</sup>/s) of liquid FA at 298 K,<sup>31, 32</sup>  $c_g^{sat}$  is the saturated liquid FA concentration, and  $H$  is the diffusion distance in the BTS.

Equation S4. The calculation of gaseous FA diffusion flux ( $N_g$ ) according to Fick law.

$$N_g = D_g^T \frac{c_g^{sat}}{H}$$

where  $D_g^T$  is the diffusion coefficient at 316 K (1.20×10<sup>-5</sup> m<sup>2</sup>/s),<sup>33</sup>  $c_g^{sat}$  is the saturated gaseous FA concentration, and  $H$  is the diffusion distance, which is also named as the gas gap in the SBS.

Equation S5. The calculation of hydrogen gas diffusion coefficient  $D_L$  in a liquid-phase environment.

$$D_L = 7.4 \times 10^{-8} \frac{T(\psi_{FA})^{0.5}}{\mu_{FA} V_{H_2}^{0.6}}$$

where  $T$  is the temperature (K),  $\psi_{FA}$  (=1.33) is the “association” parameter of FA that represents the degree of the aggregation of FA molecules,<sup>34</sup>  $M_{FA}$  and  $\mu$  denote the molecular mass and viscosity of formic acid, respectively, and  $V_{H_2}$  is the molar volume of hydrogen ( $\text{cm}^3 \text{mol}^{-1}$ ).

Equation S6. The calculation of hydrogen gas diffusion coefficient  $D_G$  in a gas-phase environment.<sup>35</sup>

$$D_G = \frac{1.86 \times 10^{-3} * T^{1.5} \sqrt{M_{H_2}^{-1} + M^{-1}}}{P * \sigma^2 * \Omega}$$

$$\sigma = \frac{1}{2} (\sigma_{H_2} + \sigma_{FA}), \quad \Omega = \frac{kT}{\sqrt{\varepsilon_{H_2} \varepsilon_{FA}}}$$

$$\varepsilon = 0.75kT_c, \quad \sigma = \frac{5}{6} \times 10^{-8} V_c^{1/3}$$

where  $M$  is the molar mass,  $P$  is the system pressure,  $\sigma$  is the average collision diameter,  $\Omega$  is a temperature-dependent collision integral, and  $k$  is the Boltzmann constant.  $\varepsilon$  and  $\sigma$  are estimated using the well-known critical parameters for a given substance, where  $T_c$  and  $V_c$  are the critical temperature (K) and the critical molar volume ( $\text{cm}^3/\text{mol}$ ), respectively.

Equation S7. The calculation of Gibbs free energy.

$$\Delta G = \Delta E + \Delta E_{ZPE} - T\Delta S$$

where  $\Delta E$  is the HCOOH adsorption energy,  $\Delta E_{ZPE}$  is the difference in zero-point energy,  $T$  is reaction temperature, and  $\Delta S$  is the difference in entropy between the adsorbed species and free species in the gas phase.

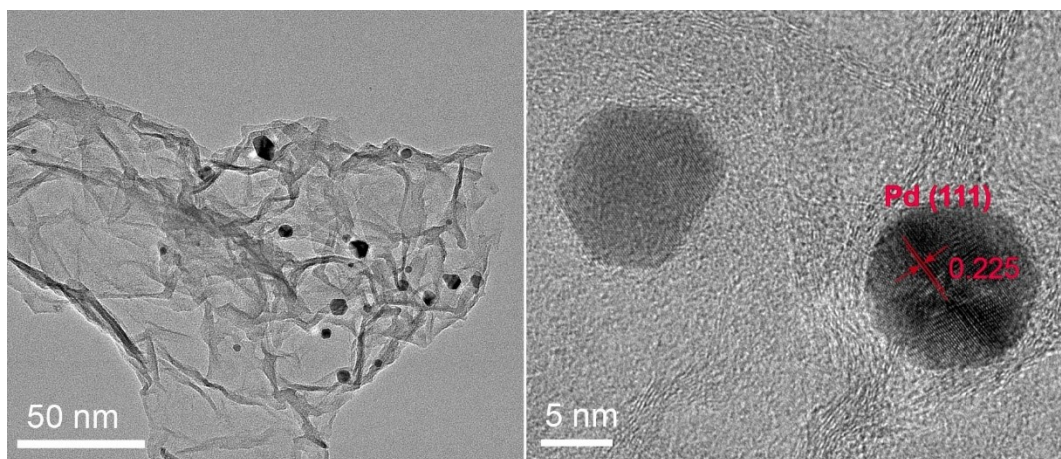

Figure S1. The TEM image of the Pd/rGO aerogel with highly dispersed Pd nanoparticles and the HRTEM image of Pd nanoparticles.

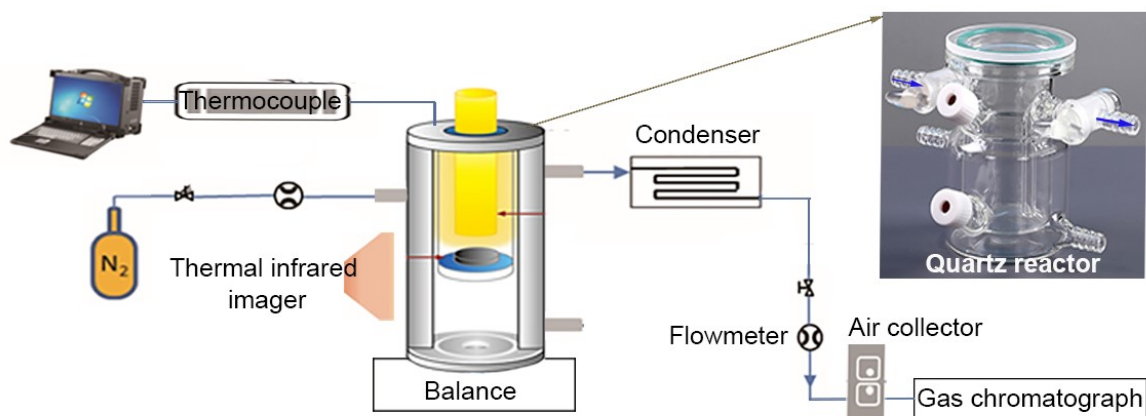

Figure S2. The experimental setup of the SBS.

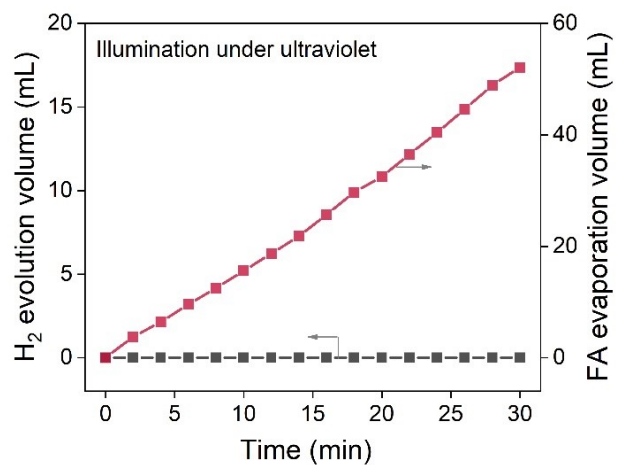

Figure S3. The H<sub>2</sub> evolution volume and FA evaporation volume of the Pd/rGO aerogel under ultraviolet illumination.



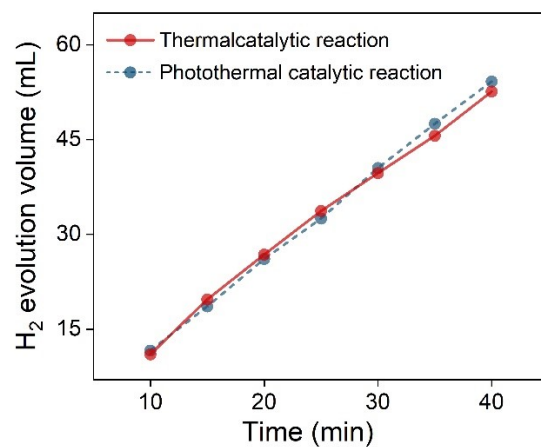

Figure S4. The H<sub>2</sub> evolution volume of the Pd/rGO aerogel under the conditions of thermal-driven reaction and photothermal-driven reactions.

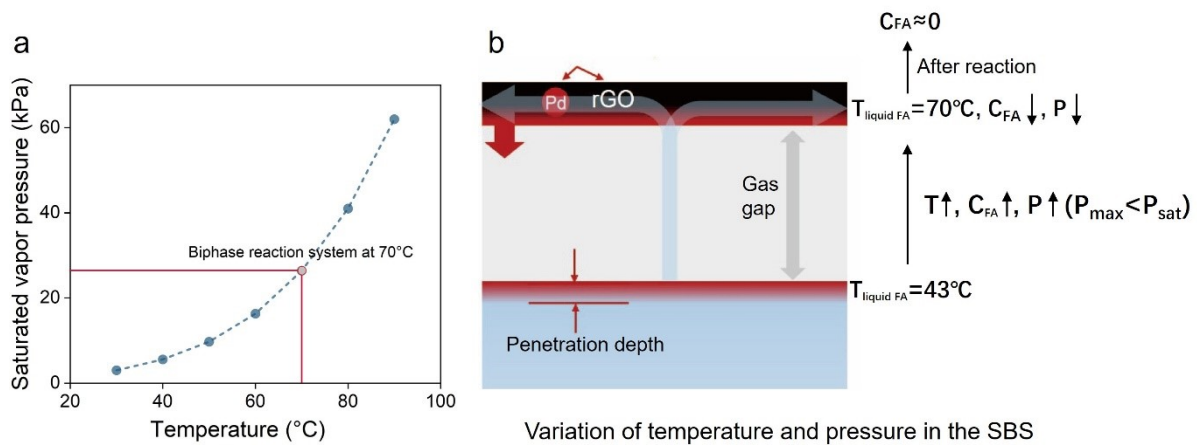

Figure S5. (a) Curve of the FA saturated vapor pressure with temperature, (b) Variation of temperature and pressure in the SBS.

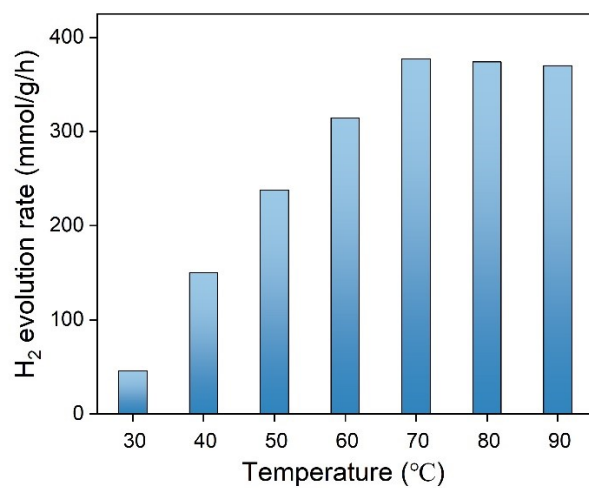

Figure S6. The H<sub>2</sub> evolution rate of the SBS under different reaction temperatures.

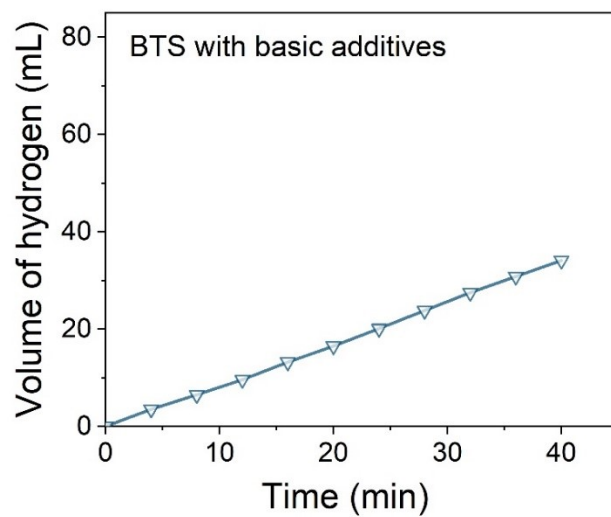

Figure S7. The hydrogen evolution performance of the BTS in the presence of liquid basic additive (HCOONa).

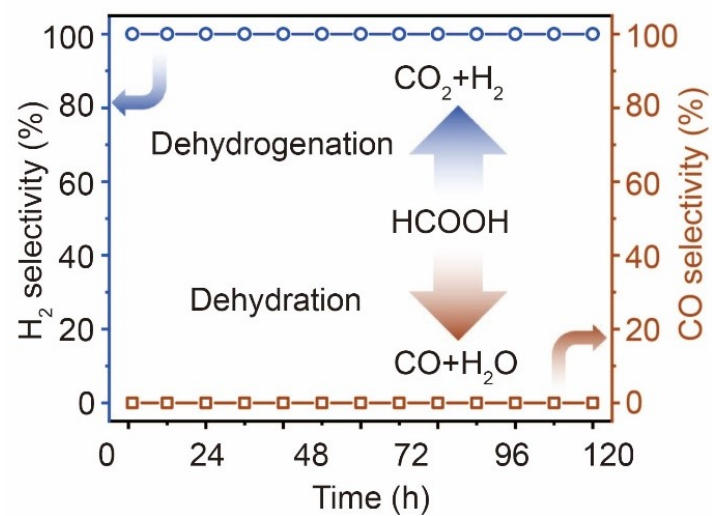

Figure S8. H<sub>2</sub> and CO selectivity of the SBS.

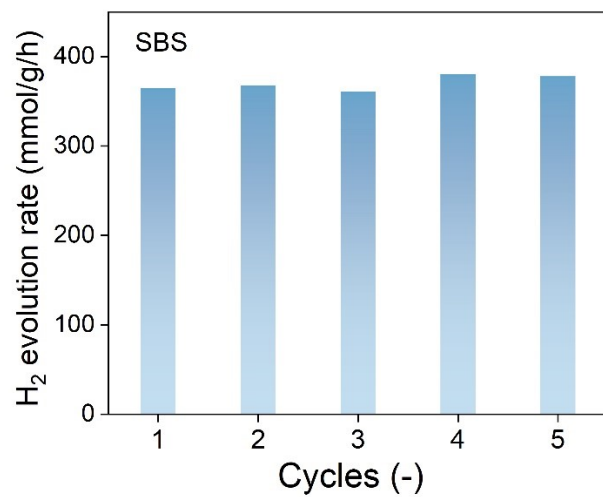

Figure S9. The H<sub>2</sub> evolution rate of the SBS in five cycles.

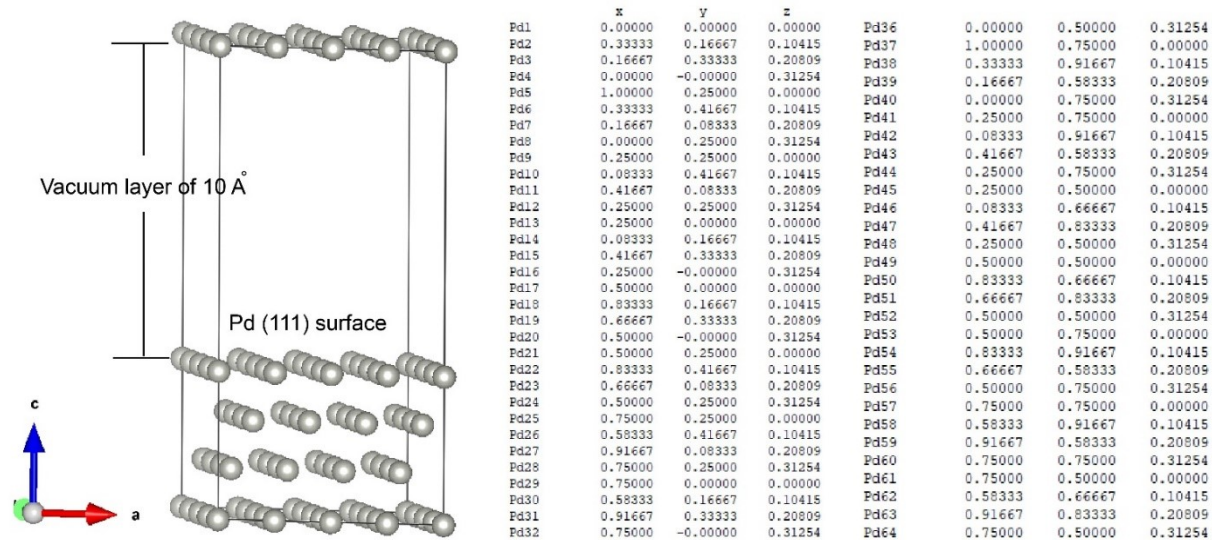

Figure S10. The optimized computation model of Pd (111) surface and its atom coordinates.

HCOOH-H<sub>2</sub>O adsorption on the Pd (111) surface

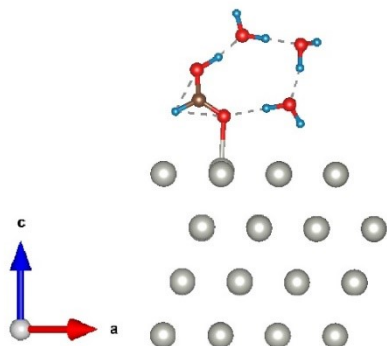

|      | x       | y       | z       |      |         |         |         |
|------|---------|---------|---------|------|---------|---------|---------|
| Pd1  | 0.00620 | 0.00705 | 0.00052 | Pd38 | 0.33906 | 0.92351 | 0.10290 |
| Pd2  | 0.33886 | 0.17356 | 0.10453 | Pd39 | 0.17266 | 0.59022 | 0.20634 |
| Pd3  | 0.17339 | 0.33972 | 0.20895 | Pd40 | 0.00617 | 0.75733 | 0.31091 |
| Pd4  | 0.00448 | 0.00579 | 0.31087 | Pd41 | 0.25574 | 0.75675 | 0.99981 |
| Pd5  | 0.00609 | 0.25651 | 0.00061 | Pd42 | 0.08925 | 0.92393 | 0.10321 |
| Pd6  | 0.33871 | 0.42299 | 0.10465 | Pd43 | 0.42275 | 0.59129 | 0.20662 |
| Pd7  | 0.17346 | 0.09198 | 0.20881 | Pd44 | 0.25632 | 0.75758 | 0.31075 |
| Pd8  | 0.00456 | 0.25781 | 0.31104 | Pd45 | 0.25591 | 0.50620 | 0.00059 |
| Pd9  | 0.25599 | 0.25672 | 0.00136 | Pd46 | 0.08897 | 0.67342 | 0.10289 |
| Pd10 | 0.08919 | 0.42304 | 0.10334 | Pd47 | 0.42271 | 0.84064 | 0.20625 |
| Pd11 | 0.42302 | 0.09038 | 0.20689 | Pd48 | 0.25674 | 0.50978 | 0.31115 |
| Pd12 | 0.25743 | 0.25839 | 0.31794 | Pd49 | 0.50546 | 0.50618 | 0.00064 |
| Pd13 | 0.25615 | 0.00687 | 0.00027 | Pd50 | 0.83903 | 0.67342 | 0.10278 |
| Pd14 | 0.08926 | 0.17349 | 0.10445 | Pd51 | 0.67269 | 0.84049 | 0.20630 |
| Pd15 | 0.42103 | 0.33960 | 0.20911 | Pd52 | 0.50845 | 0.50987 | 0.31125 |
| Pd16 | 0.25650 | 0.00577 | 0.31108 | Pd53 | 0.50582 | 0.75653 | 0.99989 |
| Pd17 | 0.50565 | 0.00676 | 0.99985 | Pd54 | 0.83894 | 0.92351 | 0.10288 |
| Pd18 | 0.83891 | 0.17315 | 0.10294 | Pd55 | 0.67262 | 0.59035 | 0.20632 |
| Pd19 | 0.67235 | 0.34051 | 0.20655 | Pd56 | 0.50653 | 0.75802 | 0.31107 |
| Pd20 | 0.50664 | 0.00758 | 0.31104 | Pd57 | 0.75599 | 0.75654 | 0.99987 |
| Pd21 | 0.50561 | 0.25642 | 0.00058 | Pd58 | 0.58890 | 0.92336 | 0.10273 |
| Pd22 | 0.83895 | 0.42326 | 0.10297 | Pd59 | 0.92260 | 0.59046 | 0.20646 |
| Pd23 | 0.67267 | 0.09055 | 0.20631 | Pd60 | 0.75624 | 0.75753 | 0.31093 |
| Pd24 | 0.50850 | 0.25798 | 0.31161 | Pd61 | 0.75613 | 0.50655 | 0.99988 |
| Pd25 | 0.75585 | 0.25670 | 0.00010 | Pd62 | 0.58888 | 0.67351 | 0.10303 |
| Pd26 | 0.58843 | 0.42303 | 0.10349 | Pd63 | 0.92297 | 0.84081 | 0.20624 |
| Pd27 | 0.92214 | 0.09022 | 0.20672 | Pd64 | 0.75661 | 0.50809 | 0.31125 |
| Pd28 | 0.75630 | 0.25780 | 0.31097 | O1   | 0.19956 | 0.21137 | 0.41604 |
| Pd29 | 0.75590 | 0.00657 | 0.99986 | O2   | 0.35897 | 0.35821 | 0.48615 |
| Pd30 | 0.58883 | 0.17320 | 0.10308 | O3   | 0.53663 | 0.53332 | 0.41129 |
| Pd31 | 0.92280 | 0.34036 | 0.20639 | O4   | 0.74096 | 0.73834 | 0.41021 |
| Pd32 | 0.75579 | 0.00742 | 0.31091 | C1   | 0.24197 | 0.25114 | 0.46881 |
| Pd33 | 0.00585 | 0.50669 | 0.00002 | C2   | 0.64140 | 0.63704 | 0.43642 |
| Pd34 | 0.33901 | 0.67354 | 0.10276 | H1   | 0.42398 | 0.42035 | 0.45136 |
| Pd35 | 0.17271 | 0.84089 | 0.20631 | H2   | 0.17638 | 0.19219 | 0.50825 |
| Pd36 | 0.00621 | 0.50785 | 0.31102 | H3   | 0.64353 | 0.63630 | 0.48728 |
| Pd37 | 0.00601 | 0.75660 | 0.99981 |      |         |         |         |

Figure S11. The optimized computation model of HCOOH-H<sub>2</sub>O molecules adsorption and its atom coordinates.



HCOOH-HCOO adsorption on the Pd (111) surface

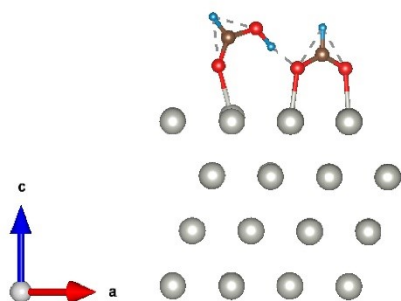

|      | x       | y       | z       |      |         |         |         |
|------|---------|---------|---------|------|---------|---------|---------|
| Pd1  | 0.00620 | 0.00705 | 0.00052 | Pd38 | 0.33906 | 0.92351 | 0.10290 |
| Pd2  | 0.33886 | 0.17356 | 0.10453 | Pd39 | 0.17266 | 0.59022 | 0.20634 |
| Pd3  | 0.17339 | 0.33972 | 0.20895 | Pd40 | 0.00617 | 0.75733 | 0.31091 |
| Pd4  | 0.00448 | 0.00579 | 0.31087 | Pd41 | 0.25574 | 0.75675 | 0.99981 |
| Pd5  | 0.00609 | 0.25651 | 0.00061 | Pd42 | 0.08925 | 0.92393 | 0.10321 |
| Pd6  | 0.33871 | 0.42299 | 0.10465 | Pd43 | 0.42275 | 0.59129 | 0.20662 |
| Pd7  | 0.17346 | 0.09198 | 0.20881 | Pd44 | 0.25632 | 0.75758 | 0.31075 |
| Pd8  | 0.00456 | 0.25781 | 0.31104 | Pd45 | 0.25591 | 0.50620 | 0.00059 |
| Pd9  | 0.25599 | 0.25672 | 0.00136 | Pd46 | 0.08897 | 0.67342 | 0.10289 |
| Pd10 | 0.08919 | 0.42304 | 0.10334 | Pd47 | 0.42271 | 0.84064 | 0.20625 |
| Pd11 | 0.42302 | 0.09038 | 0.20689 | Pd48 | 0.25674 | 0.50978 | 0.31115 |
| Pd12 | 0.25743 | 0.25839 | 0.31794 | Pd49 | 0.50546 | 0.50618 | 0.00064 |
| Pd13 | 0.25615 | 0.00687 | 0.00027 | Pd50 | 0.83903 | 0.67342 | 0.10278 |
| Pd14 | 0.08926 | 0.17349 | 0.10445 | Pd51 | 0.67269 | 0.84049 | 0.20630 |
| Pd15 | 0.42103 | 0.33960 | 0.20911 | Pd52 | 0.50845 | 0.50987 | 0.31125 |
| Pd16 | 0.25650 | 0.00577 | 0.31108 | Pd53 | 0.50582 | 0.75653 | 0.99989 |
| Pd17 | 0.50565 | 0.00676 | 0.99985 | Pd54 | 0.83894 | 0.92351 | 0.10288 |
| Pd18 | 0.83891 | 0.17315 | 0.10294 | Pd55 | 0.67262 | 0.59035 | 0.20632 |
| Pd19 | 0.67235 | 0.34051 | 0.20655 | Pd56 | 0.50653 | 0.75802 | 0.31107 |
| Pd20 | 0.50664 | 0.00758 | 0.31104 | Pd57 | 0.75599 | 0.75654 | 0.99987 |
| Pd21 | 0.50561 | 0.25642 | 0.00058 | Pd58 | 0.58890 | 0.92336 | 0.10273 |
| Pd22 | 0.83895 | 0.42326 | 0.10297 | Pd59 | 0.92260 | 0.59046 | 0.20646 |
| Pd23 | 0.67267 | 0.09055 | 0.20631 | Pd60 | 0.75624 | 0.75753 | 0.31093 |
| Pd24 | 0.50850 | 0.25798 | 0.31161 | Pd61 | 0.75613 | 0.50655 | 0.99988 |
| Pd25 | 0.75585 | 0.25670 | 0.00010 | Pd62 | 0.58888 | 0.67351 | 0.10303 |
| Pd26 | 0.58843 | 0.42303 | 0.10349 | Pd63 | 0.92287 | 0.84081 | 0.20624 |
| Pd27 | 0.92214 | 0.09022 | 0.20672 | Pd64 | 0.75661 | 0.50809 | 0.31125 |
| Pd28 | 0.75630 | 0.25780 | 0.31097 | O1   | 0.19956 | 0.21137 | 0.41604 |
| Pd29 | 0.75590 | 0.00657 | 0.99986 | O2   | 0.35897 | 0.35821 | 0.48615 |
| Pd30 | 0.58883 | 0.17320 | 0.10308 | O3   | 0.53663 | 0.53332 | 0.41129 |
| Pd31 | 0.92280 | 0.34036 | 0.20639 | O4   | 0.74096 | 0.73834 | 0.41021 |
| Pd32 | 0.75579 | 0.00742 | 0.31091 | C1   | 0.24197 | 0.25114 | 0.46881 |
| Pd33 | 0.00585 | 0.50669 | 0.00002 | C2   | 0.64140 | 0.63704 | 0.43642 |
| Pd34 | 0.33901 | 0.67354 | 0.10276 | H1   | 0.42388 | 0.42035 | 0.45136 |
| Pd35 | 0.17271 | 0.84089 | 0.20631 | H2   | 0.17638 | 0.19219 | 0.50825 |
| Pd36 | 0.00621 | 0.50785 | 0.31102 | H3   | 0.64353 | 0.63630 | 0.48728 |
| Pd37 | 0.00601 | 0.75660 | 0.99981 |      |         |         |         |

Figure S12. The optimized computation model of HCOOH-HCOO complexes adsorption and its atom coordinates.



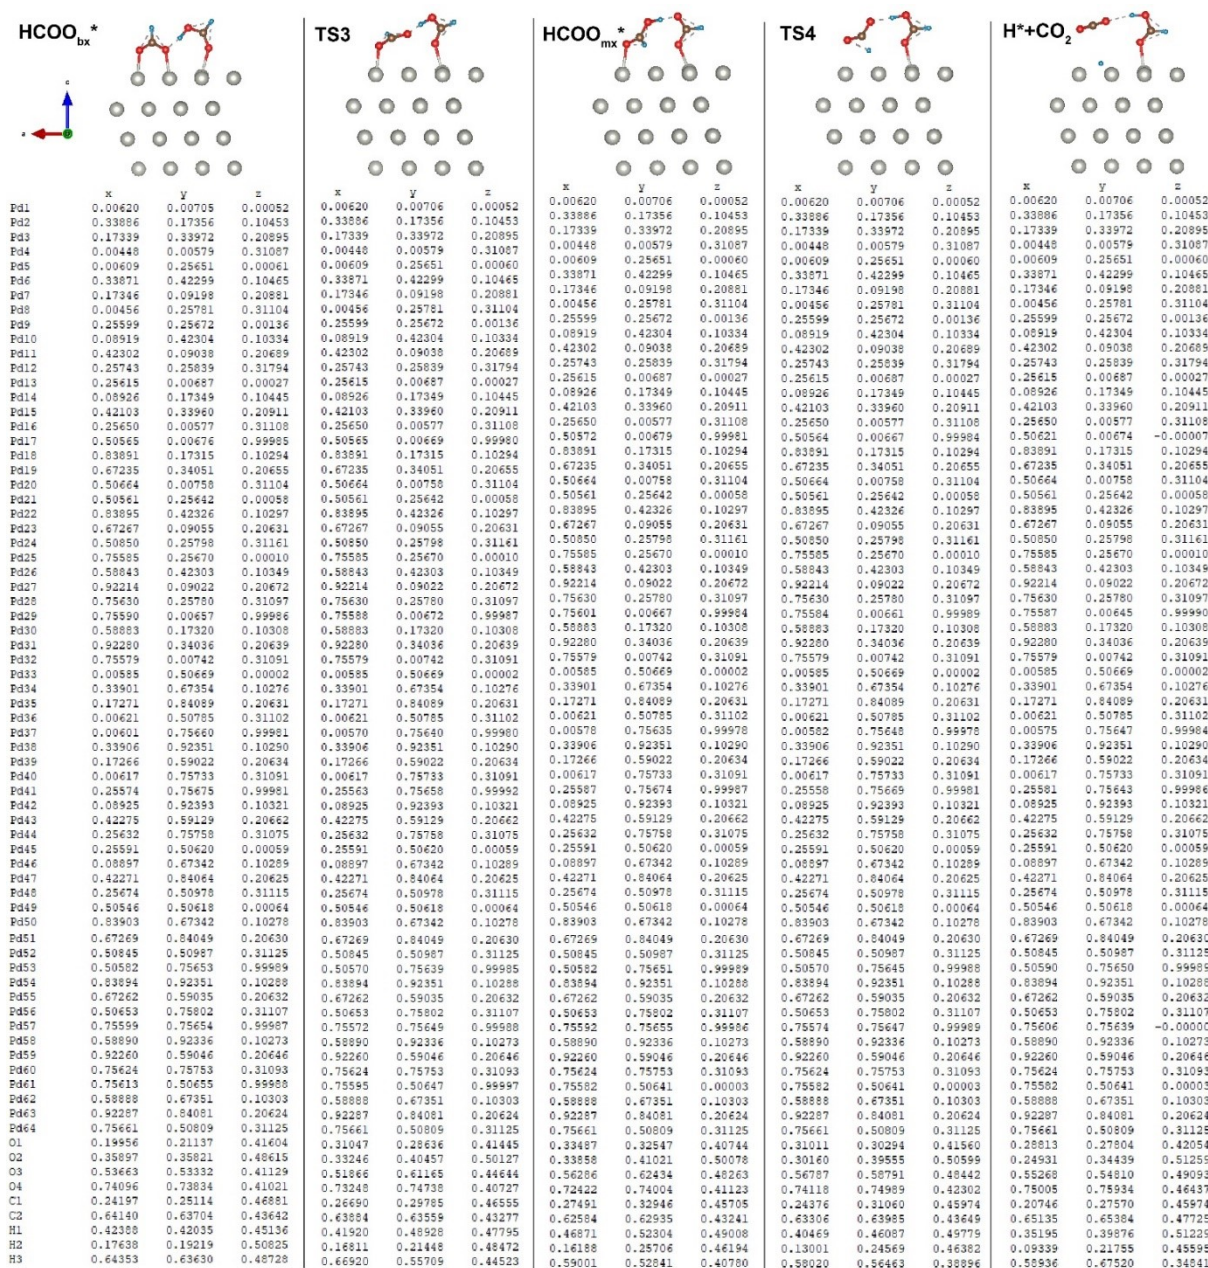

Figure S14. The atom coordinates of computation models in the Figure 4f.

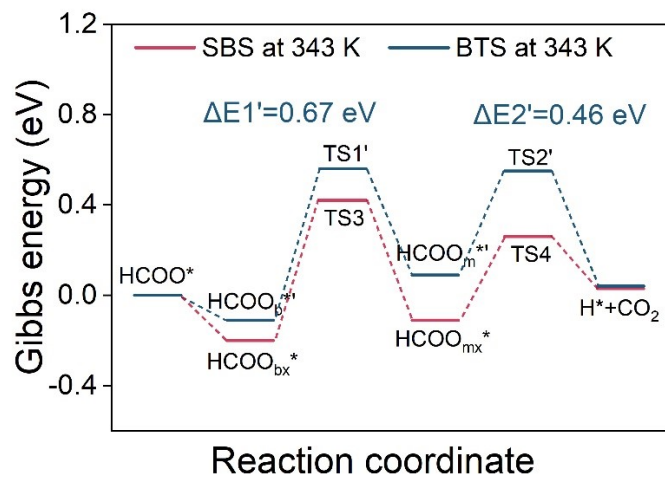

Figure S15. Gibbs free energies of the SBS and the BTS at the same temperature of 343 K.

Table S1. The comparison of reaction conditions between our work and other catalytic systems.

| Ref.            | FA concentration                                     | Additives   | Solvents         | Catalysts                      | TOF                        |
|-----------------|------------------------------------------------------|-------------|------------------|--------------------------------|----------------------------|
| 1               | 1 mol L <sup>-1</sup><br>(wt. 4.6%)                  | None        | H <sub>2</sub> O | NiPd/NH <sub>2</sub> -N-rGO    | 954.3 h <sup>-1</sup>      |
| 2               | 1 mol L <sup>-1</sup><br>(wt. 4.6%)                  | None        | H <sub>2</sub> O | PdAu/HPC-NH <sub>2</sub>       | 3763 h <sup>-1</sup>       |
| 3               | 2 mol L <sup>-1</sup><br>(wt. 9.2%)                  | None        | H <sub>2</sub> O | DHBP-Ir                        | 2800 h <sup>-1</sup>       |
| 4               | 1 mol L <sup>-1</sup><br>(wt. 4.6%)                  | None        | H <sub>2</sub> O | PdCl <sub>2</sub> Acet./Cdarco | 4888 h <sup>-1</sup>       |
| 5               | 1 mol L <sup>-1</sup><br>(wt. 4.6%)                  | None        | H <sub>2</sub> O | CrPd/MIL-101-NH <sub>2</sub>   | 2009 h <sup>-1</sup>       |
| 6               | 1 mol L <sup>-1</sup><br>(wt. 4.6%)                  | None        | H <sub>2</sub> O | AgPd/NH <sub>2</sub> -SBA-15   | 1166 h <sup>-1</sup>       |
| <b>Our work</b> | <b>&gt;21.3 mol L<sup>-1</sup><br/>(wt. &gt;98%)</b> | <b>None</b> | <b>None</b>      | <b>Pd/rGO aerogel</b>          | <b>4672 h<sup>-1</sup></b> |

1. J. M. Yan, S. J. Li, S. S. Yi, B. R. Wulan, W. T. Zheng and Q. Jiang, *Adv Mater*, 2018, 30, e1703038.
2. Z. Wang, S. Liang, X. Meng, S. Mao, X. Lian and Y. Wang, *Applied Catalysis B: Environmental*, 2021, 291.
3. I. Mellone, F. Bertini, M. Peruzzini and L. Gonsalvi, *Catalysis Science & Technology*, 2016, 6, 6504-6512.
4. J. L. Santos, C. Megías-Sayago, S. Ivanova, M. Á. Centeno and J. A. Odriozola, *Chemical Engineering Journal*, 2020.
5. D. Gao, Z. Wang, C. Wang, L. Wang, Y. Chi, M. Wang, J. Zhang, C. Wu, Y. Gu, H. Wang and Z. Zhao, *Chemical Engineering Journal*, 2019, 361, 953-959.
6. Y. Zhu, T. Nakanishi, K. Kanamori, K. Nakanishi, S. Ichii, K. Iwaida, Y. Masui, T. Kamei, T. Shimada, A. Kumamoto, Y. H. Ikuhara, M. Jeon, G. Hasegawa, M. Tafu, C. W. Yoon and T. Asefa, *ACS Applied Materials & Interfaces*, 2017, 9, 36-41.
